# Supplementary material for: Comprehensive Mapping of the Cell Response to Borrelia bavariensis in the Brain Microvascular Endothelial Cells in vitro Using RNA-Seq
Source: PubMed Central journal article supplement (PMC8606740; doi:10.3389/fmicb.2021.760627), 2021-11-08
Supplement: Data_Sheet_1.pdf [file Data_Sheet_1.pdf]

**Comprehensive mapping of the cell response to *Borrelia bavariensis* in the brain microvascular endothelial cells *in vitro* using RNA-seq**

**Zuzana Tkáčová, Katarína Bhide, Evelina Mochnáčová, Patrícia Petroušková, Jana Hrušková, Amod Kulkarni, Mangesh Bhide**

## SUPPLEMENTARY TABLES

**Supplementary Table S1. DEGs selected for primers design for qPCR**

| GENE NAME                                                  | Forward primer            | T <sub>m</sub> of forward primer | Reverse primer        | T <sub>m</sub> of reverse primer | Annealing temperature | Amplification efficiency         |
|------------------------------------------------------------|---------------------------|----------------------------------|-----------------------|----------------------------------|-----------------------|----------------------------------|
| CCL2 (C-C motif chemokine ligand 2)                        | CAATCAATGCCCCAGTCACCT     | 60.6 °C                          | TCCTGAACCCACTTCTGCTTG | 60.2 °C                          | 55 °C                 | 97%                              |
| CXCL10 (C-X-C motif chemokine ligand 10)                   | CTGCCTCCCCATATTCCTCG      | 59.7 °C                          | TCGGGTGACAAAGACGACTG  | 60 °C                            | 55 °C                 | 94%                              |
| ICAM-1 (Intercellular adhesion molecule 1)                 | CCGGCCAGCTTATACACAAGA     | 60.1 °C                          | CACATTGGAGTCTGCTGGGAA | 60.3 °C                          | 55 °C                 | 98%                              |
| IL1 $\alpha$ (Interleukin 1 alpha)                         | GACTGCCCAAGATGAAGACCA     | 50 °C                            | TTGGATGGGCAACTGATGTGA | 59.9 °C                          | 55 °C                 | 95%                              |
| TNF (Tumor necrosis factor)                                | CCTGTAGCCCATGTTGTAGCA     | 60 °C                            | GGACCTGGGAGTAGATGAGGT | 60 °C                            | 55 °C                 | 80%                              |
| VCAM-1 (Vascular cell adhesion molecule 1)                 | CCCTGAGCCCTGTGAGTTTT      | 59.9 °C                          | GGCCACCACTCATCTCGATT  | 59.8 °C                          | 55 °C                 | 98%                              |
| IL 6 (Interleukin 6)                                       | AAAACAACCTGAACCTTCCA      | 55.3 °C                          | CTCCAAAAGACCAGTGATGA  | 55 °C                            | 50 °C                 | 97%                              |
| CXCL 1 (C-X-C motif chemokine ligand 1)                    | AGTGTGAACGTGAAGTCCCC      | 59.9 °C                          | ATGGGGGATGCAGGATTGAG  | 59.5 °C                          | 55 °C                 | 94%                              |
| CXCL 11 (C-X-C motif chemokine ligand 11)                  | CCCTGGGGTAAAAGCAGTGA      | 59.6 °C                          | GCCTTGCTTGCTTCGATTTG  | 58.7 °C                          | 55 °C                 | 97%                              |
| SELE (Selectin E)                                          | TGTGGAATGATGAGAGGTGCA     | 59.4 °C                          | TGAAGCCAGGGTCACACTTG  | 60.2 °C                          | 55 °C                 | 94% (non-specific amplification) |
| IL8-CXCL 8 (Interleukin 8, C-X-C motif chemokine ligand 8) | CTCCAAACCTTTCCACCCCA      | 59.8 °C                          | TTCTCCACAACCCTCTGCAC  | 59.9 °C                          | 55 °C                 | 98%                              |
| SLC16A12 (solute carrier family 16 member 12)              | ATTGTGGCTGGCTGTTTCCT      | 60 °C                            | CCATGCCGTTTGTGCGTAAT  | 60 °C                            | 55 °C                 | 93%                              |
| METTL7A (methyltransferase like 7A)                        | GGTGTGTGCTCTGTGAAGA       | 60 °C                            | GGATCCAGGACTTGTGCCA   | 60 °C                            | 55 °C                 | 92%                              |
| TSC22D3 (TSC22 domain family member 3)                     | GACAACAAGATCGAACAGGCC     | 60 °C                            | TTCTCCACCAGCTCTCGGAT  | 60 °C                            | 55 °C                 | 99%                              |
| TIMP4 (TIMP metalloproteinase inhibitor 4)                 | ACGCCTTTTACTCTTCCCT       | 60 °C                            | AGGGCTCGATGTAGTTGCAC  | 60 °C                            | 55 °C                 | 93%                              |
| SEMA6C (semaphorin 6C)                                     | GACAGTGCTGAAGGTGCTGA      | 60 °C                            | AAAGCCTGTGACCCTCAGTG  | 60 °C                            | 55 °C                 | 93%                              |
| NPR3 (natriuretic peptide receptor 3 )                     | ACCTGAGTTTGAAGAAGTTTTCATG | 60 °C                            | AGACGTAGAGGAGGATGGCA  | 60 °C                            | 55 °C                 | 93%                              |
| MAOA (monoamine oxidase A)                                 | GTCTGCCCTGTGGTTCTTGT      | 60 °C                            | CGCTCACTTGACCAGATCCA  | 60 °C                            | 55 °C                 | 97%                              |
| WSCD1 (WSC domain containing 1)                            | GGGGCTGGAAGAGTGTAAACC     | 60 °C                            | CTGGGGAAGGCATGTGTGAT  | 60 °C                            | 55 °C                 | 93% (non-specific amplification) |

|                                           |                       |         |                       |         |       |                                  |
|-------------------------------------------|-----------------------|---------|-----------------------|---------|-------|----------------------------------|
| ATO8 (atonal bHLH transcription factor 8) | CCTCCGAGATCAAAGCCCTG  | 60 °C   | CCCATATGAGTAGCACGGCA  | 60 °C   | 55 °C | 94% (non-specific amplification) |
| CADM3 (cell adhesion molecule 3)          | ACGGGAAAAAGACACAGCCA  | 60 °C   | TGTATGCGGGTTGGTTCTCC  | 60 °C   | 55 °C | 98%                              |
| NFIA (nuclear factor I A)                 | CAGGAAGTGGCAGTCAGTCA  | 60 °C   | GAGGAGGTCTGTGAAGGGGA  | 60 °C   | 55 °C | 98%                              |
| CCL20 (C-C motif chemokine ligand 20)     | AGCAAGCAACTTTGACTGCTG | 59.9 °C | TTGGATTTGCGCACACAGAC  | 59.7 °C | 55 °C | 94% (non-specific amplification) |
| LTB (lymphotoxin beta)                    | CTCCAGGGGAGGGGTTCC    | 60.7 °C | AGTCCTCCCTGATCCTGGG   | 59.7 °C | 55 °C | 86%                              |
| SAA2 (serum amyloid A2)                   | CCTTGGTCTGAGTGTGACG   | 60.3 °C | CATAGTCCCCCGAGCATGG   | 60.3 °C | 55 °C | 92% (non-specific amplification) |
| NFKB1 (Nuclear factor kappa B subunit 1)  | TGGTGGAGTCTGGGAAGGAT  | 59.9 °C | TCCGAAGCTGGACAAACACA  | 59,8 °C | 55 °C | 94%                              |
| IL1 $\alpha$ (Interleukin 1 alpha)        | GACTGCCCAAGATGAAGACCA | 50 °C   | TTGGATGGGCAACTGATGTGA | 59.9 °C | 50 °C | 95%                              |
| CD44 (Cluster of Differentiation 44)      | CACACCCTCCCCTCATTAC   | 60 °C   | TCCCTCATGCCATCTGTTGC  | 60.4 °C | 55 °C | 93%                              |
| CTSS (Cathepsin S)                        | AAAGGCCCAAGTGTCTGTTGG | 60.5 °C | AGCCAACCACAAGTACACCA  | 59.5 °C | 55 °C | 95%                              |
| IL1B (Interleukin 1 beta)                 | GTGTTCTCCATGCCTTTGT   | 55.6 °C | TTTGGGATCTACACTCTCCA  | 55.2 °C | 50 °C | 95%                              |
| SAA1 (serum amyloid A1)                   | TTTTGATGGGGCTCGGGAC   | 60 °C   | TCGGTGATCACTTCTGCAGC  | 60.4 °C | 55 °C | 92% (non-specific amplification) |

*Best 10 primer pairs were selected (colored green in table) based on amplification efficiency and specific amplification judged by high resolution melting curve.*

**Supplementary Table S2. Primers used in qPCR validation**

| Protein (Gene)                                      | Sequence used to design primers | Primer name | Sequence (5'-3')      | Amplicon length (bp) | Annealing temperature |
|-----------------------------------------------------|---------------------------------|-------------|-----------------------|----------------------|-----------------------|
| <b>primers used for qPCR</b>                        |                                 |             |                       |                      |                       |
| Intercellular adhesion molecule 1 (ICAM-1)          | BT006854.1                      | ICAM-1F     | CCGGCCAGCTTATACACAAGA | 124                  | 60°C                  |
|                                                     |                                 | ICAM-1R     | CACATTGGAGTCTGCTGGGAA |                      |                       |
| Vascular cell adhesion molecule 1 (VCAM-1)          | AK291732.1                      | VCAM-1F     | CCCTGAGCCCTGTGAGTTTT  | 138                  | 60°C                  |
|                                                     |                                 | VCAM-1R     | GGCCACCACTCATCTCGATT  |                      |                       |
| C-C motif chemokine ligand 2 (CCL2)                 | X14768.1                        | CCL2F       | CAATCAATGCCCCAGTCACCT | 175                  | 55°C                  |
|                                                     |                                 | CCL2R       | TCCTGAACCACTTCTGCTTG  |                      |                       |
| C-X-C motif chemokine ligand 11 (CXCL11)            | Y15220.1                        | CXCL11F     | CCCTGGGGTAAAAGCAGTGA  | 149                  | 60°C                  |
|                                                     |                                 | CXCL11R     | GCCTTGCTTGCTTCGATTTG  |                      |                       |
| Interleukin 6 (IL6)                                 | M18403.1                        | IL6F        | AAAACAACCTGAACCTTCCA  | 104                  | 55°C                  |
|                                                     |                                 | IL6R        | CTCCAAAAGACCAGTGATGA  |                      |                       |
| Interleukin 8, C-X-C motif chemokine ligand 8 (IL8) | BT007067.1                      | IL8F        | CTCCAAACCTTTCCACCCCA  | 153                  | 55°C                  |
|                                                     |                                 | IL8R        | TTCTCCACAACCCTCTGCAC  |                      |                       |
| TSC22 domain family member 3 (TSC22D3)              | AF153603.1                      | TSC22D3F    | GACAACAAGATCGAACAGGCC | 107                  | 60°C                  |
|                                                     |                                 | TSC22D3R    | TTCTCCACCAGCTCTCGGAT  |                      |                       |
| Monoamine oxidase A (MAOA)                          | AK293926.1                      | MAOAF       | GTCTGCCCTGTGGTTCTTGT  | 116                  | 60°C                  |
|                                                     |                                 | MAOAR       | CGCTCACTTGACCAGATCCA  |                      |                       |
| Cell adhesion molecule 3                            | AY358332.1                      | CADM3F      | ACGGGAAAAAGACACAGCCA  | 114                  | 60°C                  |

|                              |                |        |                       |     |      |
|------------------------------|----------------|--------|-----------------------|-----|------|
| (CADM3)                      |                | CADM3R | TGTATGCGGGTTGGTTCTCC  |     |      |
| Nuclear factor I A<br>(NFIA) | U07809.1       | NFIAF  | CAGGAAGTGGCAGTCAGTCA  | 121 | 60°C |
|                              |                | NFIAR  | GAGGAGGTCTGTGAAGGGGA  |     |      |
| $\beta$ -microglobulin (B2M) | XR_002957658.1 | B2MF   | GCTCGCGCTACTCTCTCTTT  | 134 | 55°C |
|                              |                | B2MR   | CGGATGGATGAAACCCAGACA |     |      |

**Supplementary Table S3. Total number of detected clusters and mapped genes**

| Sample                      |   | Total number of detected clusters/raw reads | Total number of filtered genes |
|-----------------------------|---|---------------------------------------------|--------------------------------|
| <i>Borrelia bavariensis</i> | 1 | 13170882                                    | 11 398                         |
|                             | 2 | 12387003                                    |                                |
|                             | 3 | 13420391                                    |                                |
| Negative control            | 1 | 10185750                                    | 11 398                         |
|                             | 2 | 11548712                                    |                                |
|                             | 3 | 10507851                                    |                                |

1, 2 ,3 present biological replicates

**SUPPLEMENTARY FIGURES**

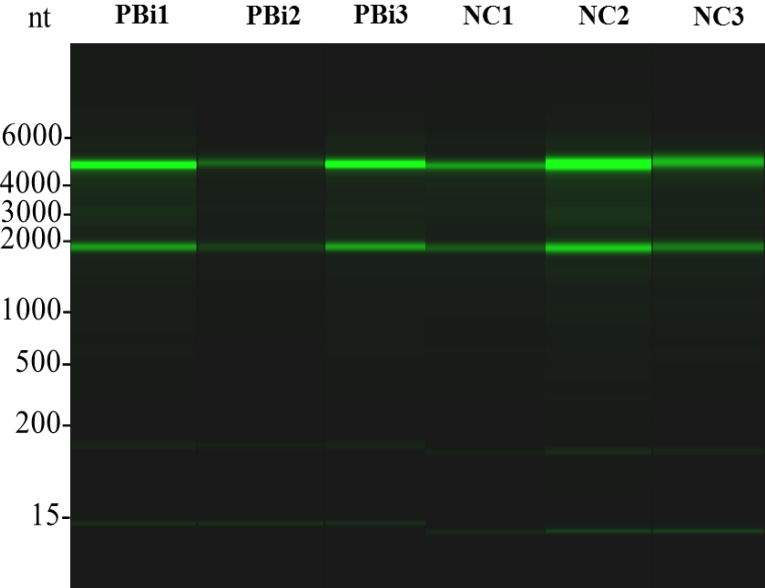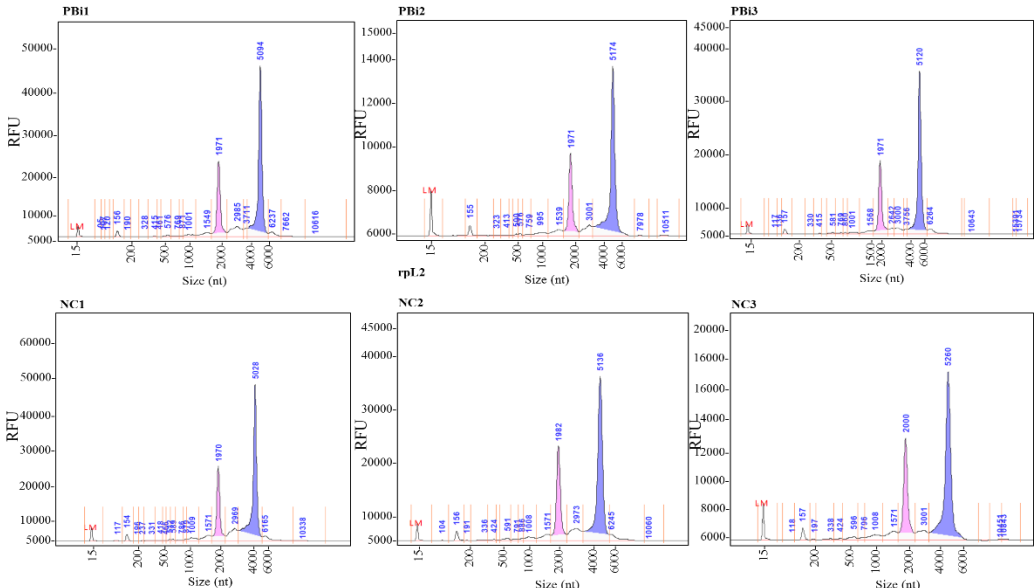

**Supplementary Figure S1. Upper figure (Electrophoresis)** - assessment of integrity of RNA isolated from hBMECs incubated with *B. bavariensis* (PBi1, 2, 3) and without any protein (negative control, NC1, 2, 3). **Graphs on the right hand (PBi1 to NC3)** - graphical representation of peaks of RNA derived from electrophoresis. RFU – relative fluorescence unit

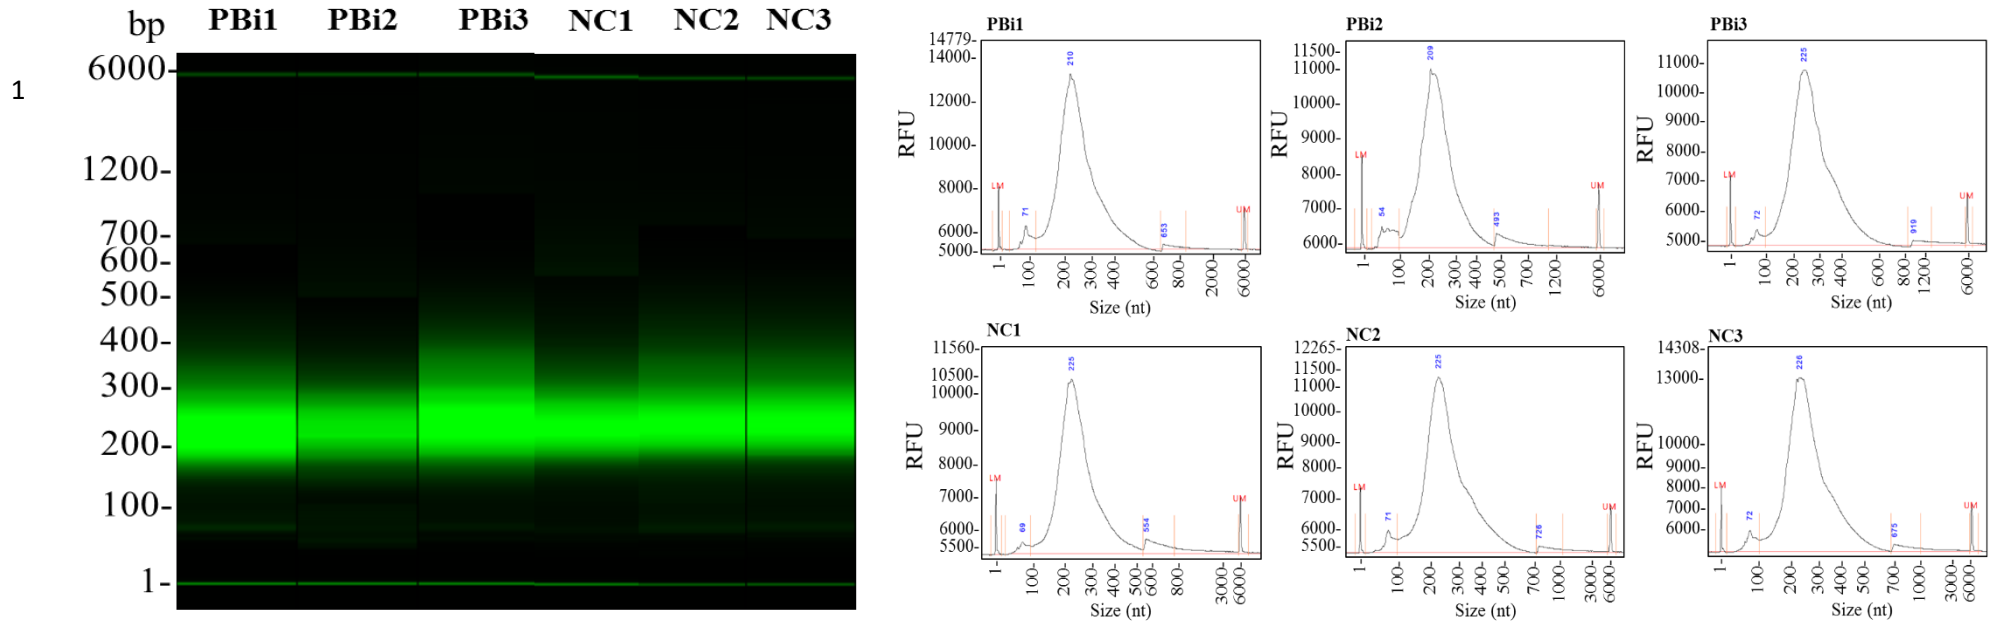

**Supplementary Figure S2. Upper figure (Electrophoresis)** - Quality control of libraries prepared with QuantSeq 3' mRNA kit used for sequencing. hBMECs induced with *B. bavariensis* (PBI1, 2, 3) and without any protein (negative control, NC1, 2, 3). Note that the ideal fragment size should be between 150-300 bp. **Graphs on the right hand (PBI1 to NC3)** - graphical representation of the peaks of DNA fragments derived from electrophoresis. RFU – relative fluorescence unit.



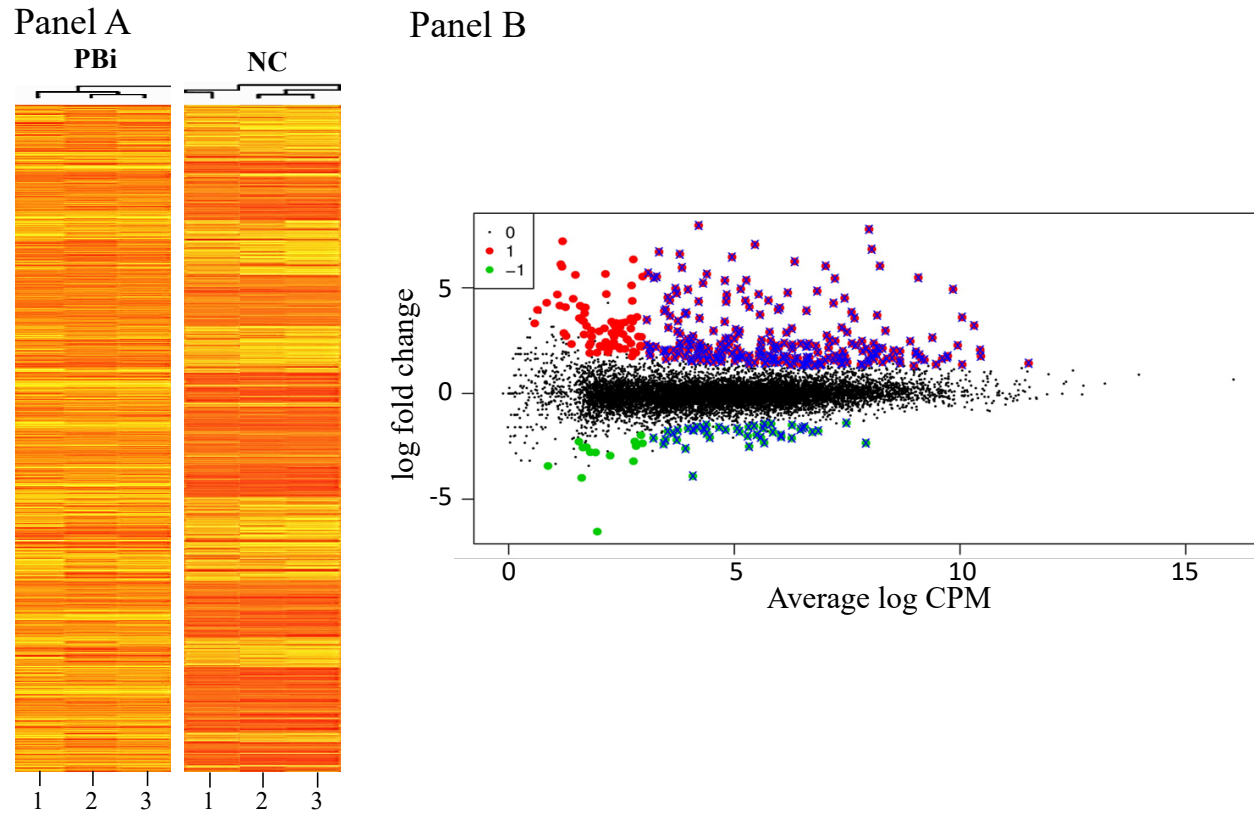

**Supplementary Figure S3. Panel A.** Heat map generated from sequence reads (1, 2, 3 represents triplicates). **Panel B.** A scatter plot showing genes (each dot presents a single gene). Log fold change with  $\pm 1.2$  was used to select DEGs. All genes which are within this range are presented with black dots (non significant). A cutoff of 3 for average log CPM was set. All the genes more than this cutoff were selected as DEGs and presented with blue cross.
